1 Submitted to *Journal of Vision*.

2 EMERGING TREND IN VISION SCIENCE

3 **Deep learning: Using machine learning**  
4 **to study biological vision**

5 Najib J. Majaj<sup>1</sup> and Denis G. Pelli<sup>1,2</sup>

6 <sup>1</sup>Center for Neural Science and <sup>2</sup>Department of Psychology, New York University

7

8

9 **ABSTRACT**

10 Today most vision-science presentations mention machine learning. Many neuroscientists use  
11 machine learning to decode neural responses. Many perception scientists try to understand  
12 recognition by living organisms. To them, machine learning offers a reference of attainable  
13 performance based on learned stimuli. This brief overview of the use of machine learning in  
14 biological vision touches on its strengths, weaknesses, milestones, controversies, and current  
15 directions.

16

## 17 INTRODUCTION

18 What does machine learning offer to biological-vision  
19 scientists? We suppose that most of our readers have  
20 heard of machine learning but are wondering how to  
21 interpret machine-learning results and whether it would  
22 be useful in their own research. We begin by naming  
23 some of its pluses and minuses.

## 24 PLUSES: WHAT IT'S GOOD FOR

25 Deep learning is the latest phase of machine learning,  
26 and is becoming very popular (Fig. 1). Is it just a fad? At  
27 the very least, machine learning is a powerful tool for  
28 interpreting biological data. For computer vision, the old  
29 paradigm was: feature detection, segmentation, and  
30 grouping (Marr, 1982). The new paradigm defines just  
31 the task and a feature set, and machine learning builds  
32 the classifier from a training set. Unlike the handcrafted  
33 pattern recognition (including segmentation and  
34 grouping) popular in the 70's and 80's, machine-learning  
35 algorithms are generic, with little domain-specificity. They  
36 replace hand-engineered feature detectors with filters  
37 that can be learned from the data. Advances in the mid  
38 90's in machine learning made statistical learning theory  
39 useful for practical classification, e.g. handwriting  
40 recognition (Vapnik, 1999).

## GLOSSARY

**Machine learning** is a computer algorithm that uses data from the environment to improve performance of a task.

**Deep learning** is the latest version of machine learning, distinguished by having more than three layers. It is ubiquitous in the internet.

**Supervised learning** refers to any algorithm that accepts a set of labeled stimuli — a training set — and returns a classifier that can label stimuli similar to those in the training set.

**Unsupervised learning** works without labels. It is less popular, but of great interest because labeled data are scarce while unlabeled data are plentiful. Without labels, the algorithm discovers structure and redundancy in the data.

**Cost function.** A function that assigns a real number representing cost to a candidate solution. Solving by optimization means minimizing cost.

**Gradient descent:** An algorithm that minimizes cost by incrementally changing the parameters in the direction of steepest descent of the cost function.

**Convexity:** A problem is convex if there are no local minima competing with the global minimum. In optimization, a convex cost function guarantees that gradient descent will always find the global minimum.

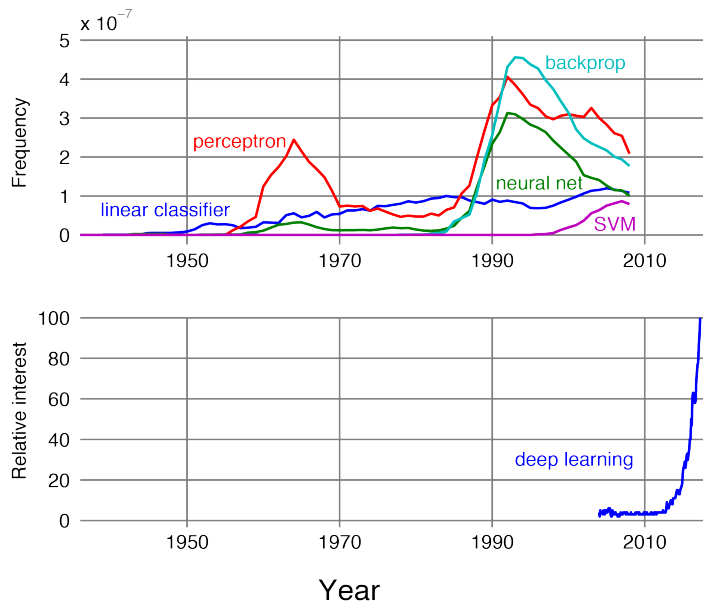

**Figure 1. Top:** The frequency of appearance of each of five terms — “linear classifier”, “perceptron”, “support vector machine”, “neural net” and “backprop” — in books indexed by Google in each year of publication. Frequency is reported as a fraction of all instances of that number of words (1,2, or 3) normalized by the number of books published that year (ngram/year/books published). The figure was created using Google’s n-gram viewer (<https://books.google.com/ngrams>), which contains a yearly count of n-grams found in sources printed between 1500 and 2008. **Bottom:** Numbers represent worldwide search interest relative to the highest point on the chart for the given year for the term “deep learning” (as reported by <https://trends.google.com/trends/>).

41 Machine learning allows a neurophysiologist to decode  
42 neural activity without knowing the receptive fields  
43 (Seung & Sompolinsky, 1993; Hung et al., 2005).  
44 Machine learning shifts the emphasis from how the cells  
45 encode to what they encode, i.e. from how they encode  
46 the stimulus to what that code tells us about the stimulus.  
47 Mapping a receptive field is the foundation of  
48 neuroscience (beginning with Weber’s 1834/1996  
49 mapping of tactile “sensory circles”), but many young  
50 scientists are impatient with the limitations of single-cell recording: looking for minutes or hours  
51 at how one cell responds to each of perhaps a hundred different stimuli. New neuroscientists

**Cross validation** assesses how well a classifier generalizes. Usually the training and test stimuli are chosen to be identically-distributed independent samples.

**Backprop**, short for “backward propagation of errors”, is widely used to apply gradient-descent learning to multi-layer networks. It uses the chain rule from calculus to iteratively compute the gradient of the cost function for each layer.

**Hebbian learning** and spike-timing dependent plasticity (**STDP**). According to Hebb’s rule, the efficiency of a synapse increases after correlated pre- and post-synaptic activity. In other words, neurons that fire together, wire together (Löwel & Singer, 1992).

**Support Vector Machine (SVM)** is a learning machine for classification. SVMs generalize well. An SVM can quickly learn to perform a nonlinear classification using what is called the “kernel trick”, mapping its input into a high-dimensional feature space (Cortes & Vapnik, 1999).

**Convolutional neural networks (ConvNets)** have their roots in the Neocognitron (Fukushima 1980) and are inspired by the simple and complex cells described by Hubel and Wiesel (1962). ConvNets apply backprop learning to multilayer neural networks based on convolution and pooling (LeCun et al., 1989; LeCun et al., 1990; LeCun et al., 1998).

52 are the first generation for whom it is patently clear that characterization of a single neuron's  
53 receptive field, which was invaluable in the retina and V1, fails to characterize how higher visual  
54 areas encode the stimulus. Statistical learning techniques reveal "how neuronal responses can  
55 best be used (combined) to inform perceptual decision-making" (Graf, Kohn, Jazayeri, &  
56 Movshon, 2010).

57 For psychophysics, Signal Detection Theory (SDT) proved that the optimal classifier for a signal  
58 in noise is a template matcher (Peterson, Birdsall, & Fox, 1954; Tanner & Birdsall, 1958). SDT  
59 has been a very useful reference in interpreting human psychophysical performance (e.g.  
60 Geisler, 1989; Pelli et al., 2006). However, it provides no account of learning. Machine learning  
61 shows promise of guiding today's investigations of human learning and may reveal the  
62 constraints imposed by the training set on learning. It can be hard to tell whether behavioral  
63 performance is limited by the set of stimuli, or the neural representation, or the mismatch  
64 between the neural decision process and the stimulus and task. Implications for classification  
65 performance are not readily apparent from direct inspection of families of stimuli and their neural  
66 responses. SDT specifies optimal performance for classification of known signals, but does not  
67 tell us how to generalize beyond a training set. Machine learning does.

68

#### 69 **MINUSES: COMMON COMPLAINTS**

70

71 Some biologists complain that neural nets do not match what we know about neurons (Crick,  
72 1989; Rubinov, 2015). In particular, it is not clear, given what we know about neurons and  
73 neural plasticity, whether a backpropagation network can be implemented using biologically  
74 plausible circuits (but see Mazzoni et al., 1991, and Bengio et al., 2015). With a different,  
75 perspective, engineers and computer scientists, though inspired by biological vision, focus on  
76 what works.

77 Some biological modelers complain that neural nets have alarmingly many parameters. Deep  
78 neural networks continue to be opaque, especially if the problem is not known to be convex.  
79 Before neural-network modeling, a model was simpler than the data it explained. Deep neural  
80 nets are typically as complex as the data, and the solutions are hard to visualize (but see Zeiler  
81 & Fergus, 2013). However, while the training sets and learned weights are long lists, the  
82 generative rules for the network (the computer programs) are short.

83 Some cognitive psychologists dismiss deep neural networks as unable to “master some of the  
84 basic things that children do, like learning the past tense of a regular verb” (Marcus et al., 1992).

85 Some statisticians worry that rigorous statistical tools are being displaced by machine learning,  
86 which lacks rigor (Friedman, 1998; Matloff, 2014, but see Breiman, 2001; Efron & Hastie, 2016).

87 Assumptions are rarely stated. There are no confidence intervals on the solution. However,  
88 performance is typically cross-validated, showing generalization, and it has been proven that  
89 convex networks can compute posterior probability (Rojas, 1996).

90 Some of the best classifiers in computer science were inspired by biological principles  
91 (Rosenblatt, 1957; 1958; Rumelhart et al., 1986; LeCun, 1985; LeCun et al. 1989; LeCun et al.  
92 1990; Riesenhuber & Poggio, 1999; and see LeCun, Bengio, Hinton 2015). Those classifiers  
93 are now so good that they occasionally exceed human performance and might serve as models  
94 for how biological systems classify (e.g. Ziskind, Hénaff, LeCun, & Pelli, 2014).

## 95 **MATHEMATICS VS. ENGINEERING**

96 The history of machine learning has two threads: mathematics and engineering. In the  
97 *mathematical* thread, two statisticians, Fisher and later Vapnik, developed mathematical  
98 transformations to uncover categories in data, and proved that they give unique answers. They  
99 assumed distributions and proved convergence.

100 In the *engineering* thread, a loose coalition of psychologists, neuroscientists, and computer  
101 scientists (e.g. Rosenblatt, Minsky, Fukushima, Hinton, Sejnowski, LeCun, Poggio) sought to  
102 reverse-engineer the brain to build a machine that learns. Their algorithms are typically applied  
103 to stimuli with unknown distributions and lack proofs of convergence.

#### 104 **MILESTONES IN CLASSIFICATION**

105 1936: Linear discriminant analysis

106 1953: Machine learning

107 1958: Perceptron

108 1969: Death of the perceptron

109 1974: Backprop

110 1980: Neocognitron

111 1987: NETtalk

112 1989: ConvNets

113 1995: Support Vector Machine (SVM)

114 2006: Backprop, revived

115 2012: Deep learning

116

117 **1936: Linear discriminant analysis.** Fisher (1936) introduced linear discriminant analysis to  
118 classify two species of iris flower based on four measurements per flower. When the distribution  
119 of the measurements is normal and the covariance matrix between the measurements is known,

120 linear discriminant analysis answers the question: Supposing we use a single-valued function to  
121 classify, what linear function  $y = w_1x_1 + w_2x_2 + w_3x_3 + w_4x_4$ , of four measurements  $x_1, x_2, x_3, x_4$   
122 made on flowers, with free weights  $w_1, w_2, w_3, w_4$ , will maximize the ratio of the difference  
123 between the means to the standard deviations within species?<sup>1</sup> Linear classifiers are great for  
124 simple problems for which the category boundary is a hyperplane in a small number of  
125 dimensions. However, complex problems like object recognition typically require more complex  
126 category boundaries in a large number of dimensions. Furthermore, the distributions of the  
127 features are typically unknown and not necessarily normal.

128 Cortes & Vapnik (1995) note that the first algorithm for pattern recognition was Fisher's optimal  
129 decision function for classifying vectors from two known distributions. Fisher solved for the  
130 optimal classifier in the presence of gaussian noise and known covariance between elements of  
131 the vector. When the covariances are equal, this reduces to a linear classifier. The ideal  
132 template matcher of signal detection theory is an example of such a linear classifier (Peterson et  
133 al., 1954). This fully specified simple problem can be solved analytically. Of course, many  
134 important problems are not fully specified. In everyday perceptual tasks, we typically know only  
135 a "training" set of samples and labels.

136 **1953: Machine learning.** The first developments in machine learning were to play chess and  
137 checkers. "Could one make a machine to play chess, and to improve its play, game by game,  
138 profiting from its experience?" (Turing, 1953). Arthur Samuel defined *machine learning* as the  
139 "Field of study that gives computers the ability to learn without being explicitly programmed."  
140 (Samuel, 1959)

---

<sup>1</sup> Linear discriminant analysis is an outgrowth of regression which has a much longer history. Regression is the optimal least-squares linear combination of given functions to fit given data and was applied by Legendre (1805) and Gauss (1809) to astronomical data to determine the orbits of the comets and planets around the sun. The estimates come with confidence intervals and the fraction of variance accounted for, which rates the goodness of the explanation.

141 **1958: Perceptron.** Inspired by physiologically measured receptive fields, Rosenblatt (1958)  
142 showed that a very simple neural network, the perceptron, could learn to classify from training  
143 samples. Perceptrons combined several linear classifiers to implement piecewise-linear  
144 separating surfaces. The perceptron learns the weights to use in a linear combination of feature-  
145 detector outputs. The perceptron transforms the stimulus into a feature vector and then applies  
146 a linear classifier to the feature vector. The perceptron is piecewise linear and has the ability to  
147 learn from training examples without knowing the full distribution of the stimuli. Only the final  
148 layer in the perceptron learns.

149 **1969: Death of the perceptron.** However, it quickly became apparent that the perceptron and  
150 other single-layer neural networks cannot learn tasks that are not linearly separable, i.e. cannot  
151 solve problems like connectivity (Are all elements connected?) and parity (Is the number of  
152 elements odd or even?); people solve these readily (Minsky & Papert, 1969). On this basis they  
153 announced the death of artificial neural networks.

154 **1974: Backprop.** The death of the perceptron showed that learning in a one-layer network was  
155 too limited. This impasse was broken by the introduction of the backprop algorithm, which  
156 allowed learning to propagate through multiple-layer neural networks. The history of backprop is  
157 complicated (see Schmidhuber, 2015). The idea of minimisation of error through a differentiable  
158 multi-stage network was discussed as early as the 1960s (e.g. Bryson, Denham, & Dreyfus,  
159 1963). It was applied to artificial neural networks in the 1970s (e.g. Werbos, 1974). In the 1980s,  
160 efficient backprop first gained recognition, and led to a renaissance in the field of artificial neural  
161 network research (LeCun, 1985; Rumelhart, Hinton, & Williams, 1986). During the 2000s  
162 backprop neural networks fell out of favor, due to four limitations (Vapnik, 1999): **1. No proof of**  
163 **convergence.** Backprop uses gradient descent. Gradient descent with a nonconvex error  
164 function with multiple minima is only guaranteed to find a local, not the global of the error



165 function. This has long been considered a major limitation, but Yann LeCun et al. (2015) claim  
166 that it hardly matters in practice in current implementations of deep learning. **2. Slow.**  
167 Convergence to a local minimum can be slow due to the high dimensionality of the weight  
168 space. **3. Poorly specified.** Backprop neural networks had a reputation of being ill-specified, an  
169 unconstrained number of units and training examples, and a step size that varied by problem.  
170 “Neural networks came to be painted as slow and fussy to train [,] beset by voodoo parameters  
171 and simply inferior to other approaches.” (Cox & Dean, 2014). **4. Not biological.** Lastly,  
172 backprop learning may not to be physiological: While there is ample evidence for Hebbian  
173 learning (increase of a synapse’s gain after correlated activity of the two cells that it connects),  
174 such changes are never propagated farther back, beyond the one synapse, to a previous layer.

175 **1980: Neocognitron**, the first convolutional neural network. Kunihiko Fukushima (1980)  
176 proposed and implemented the Neocognitron, a hierarchical, multilayered artificial neural  
177 network. It recognized stimulus patterns (numbers) despite small changes in position and  
178 shape. It didn'

179 **1987: NETtalk**, the first impressive backprop neural network. Sejnowski et al. (1987) reported  
180 the exciting success of NETtalk, a neural network that learned to convert English text to speech:  
181 *“The performance of NETtalk has some similarities with observed human performance. (i) The*  
182 *learning follows a power law. (ii) The more words the network learns, the better it is at*  
183 *generalizing and correctly pronouncing new words. (iii) The performance of the networks*  
184 *degrades very slowly as connections in the network are damaged: no single link or processing*  
185 *unit is essential. (iv) Relearning after damage is much faster than learning during the original*  
186 *training. (v) Distributed or spaced practice is more effective for long-term retention than massed*  
187 *practice.”*

188 **1989: ConvNets.** Yann LeCun and his colleagues combined convolutional neural networks with  
189 backprop to recognize handwritten characters (LeCun et al., 1989; LeCun et al., 1990). This  
190 network was commercially deployed by AT&T, and today reads millions of checks a day  
191 (LeCun, 1998). Later, adding half-wave rectification and max pooling greatly improved its  
192 accuracy in recognizing objects (Jarrett et al., 2009).

193 **1995: Support Vector Machine (SVM).** Cortes & Vapnik (1995) proposed the support vector  
194 network, a learning machine for binary classification problems. SVMs generalize well and are  
195 free of mysterious training parameters. Many versions of the SVM are convex (e.g. Lin, 2001).

196 **2006: Backprop, revived.** Hinton & Salakhutdinov (2006) sped up backprop learning by  
197 unsupervised pre-training. This helped to revive interest in backprop. In the same year, a  
198 supervised backprop-trained convolutional neural network set a new record on the famous  
199 MNIST handwritten-digit recognition benchmark (Ranzato et al., 2006).

200 **2012: Deep learning.** Geoff Hinton says, “it took 17 years to get deep learning right; one year  
201 thinking and 16 years of progress in computing, praise be to Intel.” (Cox & Dean, 2014; LeCun,  
202 Bengio, & Hinton, 2015). It is not clear who coined the term “deep learning”.<sup>2</sup> In their book, *Deep*  
203 *Learning Methods and Applications*, Deng & Yu (2014) cite Hinton et al. (2006) and Bengio  
204 (2009) as the first to use the term. However, the big debut for deep learning was an influential  
205 paper by Krizhevsky et al. (2012) describing AlexNet, a deep convolutional neural network that  
206 classified 1.2 million high-resolution images into 1000 different classes, greatly outperforming  
207 previous state-of-the-art machine learning and classification algorithms.

---

<sup>2</sup> The idea of “deep learning” is not exclusive to machine learning and neural networks (e.g. Dechter, 1986)

## 208 **CONTROVERSIES**

209 **Unproven convexity.** A problem is convex if there are no local minima other than the global  
210 minimum. This guarantees that gradient-descent will converge to the global minimum. As far as  
211 we know, classifiers that give inconsistent results are not useful. Conservation of a solution  
212 across seeds and algorithms is evidence for convexity. For some combinations of stimuli,  
213 categories, and classifiers, convexity can be proved. For others, empirical tests can provide  
214 qualified assurance that the solution is a global minimum. Many widely used networks are not  
215 convex, but still give mostly consistent answers (LeCun, Bengio, & Hinton, 2015). In machine  
216 learning, kernel methods, including learning by SVMs, have the advantage of easy-to-prove  
217 convexity, at the cost of limited generalization. In the 1990s, SVMs were popular because they  
218 guaranteed fast convergence even with a large number of training samples (Cortes & Vapnik,  
219 1995). Thus, when the problem is convex, the quality of solution is assured and one can rate  
220 implementations by their demands for size of network and training sample. Deep neural  
221 networks, on the other hand, generalize well, but are not convex.

222 **Shallow vs. deep networks.** The field's imagination has focused alternately on shallow and  
223 deep networks, beginning with the Perceptron in which only one layer learned, to backprop,  
224 which allowed multiple layers and cleared the hurdles that killed the Perceptron. Then SVM,  
225 with its single layer, sidelined the multilayer backprop, and today the multilayer deep learning  
226 seems to reign. Krizhevsky et al. (2012) attributed the success of their network to its 8-layer  
227 depth; it performed worse with fewer layers.

228 **Supervised vs. unsupervised.** Learning algorithms for a classifier can be supervised or not,  
229 i.e. need labels for training, or don't. Today most machine learning is *supervised* (LeCun,  
230 Bengio, & Hinton, 2015). The images are labeled (e.g. "car" or "face"), or the network receives  
231 feedback on each trial from a cost function that assesses how well its answer matches the

232 image's category. In *unsupervised* learning, the network processes images, typically to minimize  
233 error in reconstruction, with no extra information about what is in the (unlabeled) image. A cost  
234 function can also reward decorrelation and sparseness. This allows learning of image statistics  
235 and has been used to train early layers in deep neural networks. Human learning of  
236 categorization is sometimes done with explicitly named objects — “Look at the tree!” — but  
237 more commonly the feedback is implicit. Consider reaching your hand to raise a glass of water.  
238 Contact informs vision.

## 239 **CURRENT DIRECTIONS**

240 **What does deep learning add to the vision-science toolbox?** Deep learning is more than  
241 just a souped up regression (Marblestone et al., 2016). Like Signal Detection Theory (SDT), it  
242 allows us to see more in our behavioral and neural data. In the 1940's, Norbert Wiener and  
243 others developed algorithms to automate and optimize signal detection and classification. A lot  
244 of it was engineering. The whole picture changed with the SDT theorems, mainly the proof that  
245 the maximum-likelihood receiver is optimal for a wide range of simple tasks (Peterson et al.,  
246 1954). Later work added prior probability, for a Bayesian approach. Tanner & Birdsall (1958)  
247 noted that, when figuring out how a biological system does a task, it is very helpful to know the  
248 optimal algorithm and to rate observed performance by its *efficiency* relative to the optimum.  
249 SDT solved detection and classification mathematically, as maximum likelihood. It was the  
250 classification math of the sixties. Machine learning is the classification math of today. Both  
251 enable deeper insight into how biological systems classify. In the old days we used to compare  
252 human and ideal classification performance. Today, we can also compare human and machine  
253 learning.

254 **What computer scientists can learn from psychophysics.** Computer scientists build  
255 classifiers to recognize objects. Vision scientists, including psychologists and neuroscientists,

256 study how people and animals classify in order to understand how the brain works. So what do  
257 computer and vision scientists have to say to each other? Machine learning accepts a set of  
258 labelled stimuli to produce a classifier. Much progress has been made in physiology and  
259 psychophysics by characterizing how well biological systems can classify stimuli. The  
260 psychophysical tools (e.g. threshold and signal detection theory) developed to characterize  
261 behavioral classification performance are immediately applicable to characterize classifiers  
262 produced by machine learning (e.g. Ziskind, Hénaff, LeCun, & Pelli, 2014).

263 **Psychophysics.** “Adversarial” examples have been presented as a major flaw in deep neural  
264 networks. These slightly doctored images of objects are misclassified by a trained network,  
265 even though the doctoring has little effect on human observers. The same doctored images are  
266 similarly misclassified by several different networks trained with the same stimuli (Szegedy, et  
267 al., 2013). Humans too have adversarial examples. Illusions are robust classification errors. The  
268 blindspot-filling-in illusion is a dramatic adversarial example in human vision. While viewing with  
269 one eye, two finger tips touching in the blindspot are perceived as one long finger. If the image  
270 is shifted a bit so that the fingertips emerge from the blindspot the viewer sees two fingers.  
271 Neural networks lacking the anatomical blindspot of human vision are hardly affected by the  
272 shift. The existence of adversarial examples is intrinsic to classifiers trained with finite data,  
273 whether biological or not. In the absence of information, neural networks interpolate and so do  
274 biological brains. Psychophysics, the scientific study of perception, has achieved its greatest  
275 advances by studying classification errors. Such errors can reveal “blindspots”. Stimuli that are  
276 physically different yet indistinguishable are called *metamers*. The systematic understanding of  
277 color metamers revealed the three dimensions of human color vision (Palmer, 1777; Young,  
278 1802; Helmholtz, 1860).

279 **CONCLUSION**

280 Machine learning is here to stay. Deep learning is better than the “neural” networks of the  
281 eighties. Machine learning is useful both as a model for perceptual processing, and as a  
282 decoder of neural processing, to see what information the neurons are carrying. The large size  
283 of the human cortex is a distinctive feature of our species and crucial for learning. It is  
284 anatomically homogenous yet solves diverse sensory, motor, and cognitive problems. Key  
285 biological details of cortical learning remain obscure, and may preclude backprop, but the  
286 performance of current machine learning algorithms is a useful benchmark.

287 **ACKNOWLEDGEMENTS**

288 Thanks to Yann LeCun for helpful conversations. Thanks to Aenne Brielmann and Laura Suci  
289 for helpful comments on the manuscript.

290 **REFERENCES**

- 291 Bengio, Y. (2009). Learning deep architectures for AI. *Foundations and Trends in Machine*  
292 *Learning*, 2(1), 1–127.
- 293 Bengio, Y., Lee, D. H., Bornschein, J., Mesnard, T., & Lin, Z. (2015). Towards biologically  
294 plausible deep learning. *arXiv preprint arXiv:1502.04156*.
- 295 Breiman, L. (2001). Statistical modeling: The two cultures (with comments and a rejoinder by  
296 the author). *Statistical science*, 16(3), 199-231.
- 297 Bryson, A. E., Denham, W. F., & Dreyfus, S. E. (1963). Optimal programming problems with  
298 inequality constraints. *AIAA journal*, 1(11), 2544-2550.
- 299 Caporale, N., & Dan, Y. (2008). Spike timing-dependent plasticity: a Hebbian learning rule.  
300 *Annu. Rev. Neurosci.*, 31, 25-46.
- 301 Cox, D. D., & Dean, T. (2014). Neural networks and neuroscience-inspired computer vision.  
302 *Current Biology*, 24(18), R921-R929.
- 303 Crick, F. (1989). The recent excitement about neural networks. *Nature*, 337(6203), 129.
- 304 Dechter, R. (1986). Learning while searching in constraint-satisfaction-problems. In *Proceedings*  
305 *of the Fifth AAAI National Conference on Artificial Intelligence* (pp. 178-183). AAAI Press.
- 306 Deng, L., & Yu, D. (2014). Deep learning: methods and applications. *Foundations and Trends®*  
307 *in Signal Processing*, 7(3–4), 197-387.
- 308 Efron, B., & Hastie, T. (2016). *Computer Age Statistical Inference: Algorithms, Evidence, and*  
309 *Data Science* (Vol. 5). Cambridge University Press.
- 310 Fisher, R. A. (1922). The goodness of fit of regression formulae, and the distribution of  
311 regression coefficients. *Journal of the Royal Statistical Society*, 85(4), 597-612.  
312 doi:10.2307/2341124.
- 313 Fisher, R. A. (1925). *Statistical methods for research workers*. Genesis Publishing Pvt Ltd.
- 314 Fisher, R. A. (1936). The use of multiple measurements in taxonomic problems. *Annals of*  
315 *eugenics* 7.2, 179-188.
- 316 Fisher, R. A. (1954). *Statistical Methods for Research Workers* (Twelfth ed.). Edinburgh: Oliver  
317 and Boyd. ISBN 0-05-002170-2.
- 318 Friedman, J. H. (1998). Data mining and statistics: What's the connection? *Computing Science*  
319 *and Statistics*, 29(1), 3-9
- 320 Fukushima, K. (1980). Neocognitron: A self-organizing neural network model for a mechanism  
321 of pattern recognition unaffected by shift in position. *Biological cybernetics*, 36(4), 193-202.

- 322 Galton, F. (1877). Typical laws of heredity. *Nature*, 15(389), 512-514.
- 323 Gauss, C.F. (1809). *Theoria motus corporum coelestium in sectionibus conicis solem*  
324 *ambientium*. Hamburg: Friedrich Perthes und I. H. Besser.
- 325 Geisler, W. S. (1989). Sequential ideal-observer analysis of visual discriminations.  
326 *Psychological review*, 96(2), 267.
- 327 Helmholtz, H. von (1860/1925). *Handbuch der physiologischen Optik*, volume II. Leopold Voss,  
328 Leipzig, third edition. Translated as *Treatise on Physiological Optics*, volume II. The Optical  
329 Society of America, 1925. Edited by James P. C. Southall.
- 330 Hinton, G. E., Osindero, S., & Teh, Y. W. (2006). A fast learning algorithm for deep belief nets.  
331 *Neural computation*, 18(7), 1527-1554.
- 332 Hubel, D. H., & Wiesel, T. N. (1962). Receptive fields, binocular interaction and functional  
333 architecture in the cat's visual cortex. *The Journal of physiology*, 160(1), 106-154.
- 334 Hung, C. P., Kreiman, G., Poggio, T., & DiCarlo, J. J. (2005). Fast readout of object identity from  
335 macaque inferior temporal cortex. *Science*, 310(5749), 863-866.
- 336 Ivakhnenko, A. G. (1971). Polynomial theory of complex systems. *IEEE Transactions on*  
337 *Systems, Man and Cybernetics*, 4, 364-378.
- 338 Ivakhnenko, A. G. & Lapa, V. G. (1965). *Cybernetic Predicting Devices*. CCM Information  
339 Corporation.
- 340 Jarrett, K., Kavukcuoglu, K., & LeCun, Y. (2009). What is the best multi-stage architecture for  
341 object recognition? In *IEEE 12th International Conference on Computer Vision*. pp. 2146-2153.
- 342 Krizhevsky, A., Sutskever, I., & Hinton, G. E. (2012). Imagenet classification with deep  
343 convolutional neural networks. In *Advances in neural information processing systems*, pp. 1097-  
344 1105.
- 345 LeCun, Y. (1985). Une procedure d'apprentissage pour reseau a seuil asymmetrique (A  
346 learning scheme for asymmetric threshold networks). In *Proceedings of Cognitiva 85*, Paris,  
347 France. pp. 599-604.
- 348 LeCun, Y., Boser, B., Denker, J. S., Henderson, D., Howard, R. E., Hubbard, W., & Jackel, L. D.  
349 (1989). Backpropagation applied to handwritten zip code recognition. *Neural computation*, 1(4),  
350 541-551.
- 351 LeCun, Y., Boser, B. E., Denker, J. S., Henderson, D., Howard, R. E., Hubbard, W. E., & Jackel,  
352 L. D. (1990). Handwritten digit recognition with a back-propagation network. In *Advances in*  
353 *neural information processing systems* (pp. 396-404).
- 354 LeCun, Y., Bottou, L., Bengio, Y., & Haffner, P. (1998). Gradient-based learning applied to  
355 document recognition. *Proceedings of the IEEE*, 86(11), 2278-2324.



- 356 LeCun, Y., Bengio, Y., & Hinton, G. (2015). Deep learning. *Nature*, 521(7553), 436-444.
- 357 Legendre, A. M. (1805). *Nouvelles méthodes pour la détermination des orbites des comètes*  
358 (No. 1). F. Didot.
- 359 Lin, C. J. (2001). On the convergence of the decomposition method for support vector  
360 machines. *IEEE Transactions on Neural Networks*, 12(6), 1288-1298.
- 361 Lowel, S., & Singer, W. (1992). Selection of intrinsic horizontal connections in the visual cortex  
362 by correlated neuronal activity. *Science*, 255(5041), 209.
- 363 Marcus, G. F., Pinker, S., Ullman, M., Hollander, M., Rosen, T. J., Xu, F., & Clahsen, H. (1992).  
364 Overregularization in language acquisition. *Monographs of the society for research in child*  
365 *development*, i-178.
- 366 Marr, D. (1982). *Vision: A computational investigation into the human representation and*  
367 *processing of visual information*. San Francisco, CA: Freeman and Company.
- 368 Matloff, N. (2014). Statistics: Losing Ground to CS, Losing Image Among Students. *Revolutions*.  
369 August 26, 2014. [http://blog.revolutionanalytics.com/2014/08/statistics-losing-ground-to-cs-losing-image-among-](http://blog.revolutionanalytics.com/2014/08/statistics-losing-ground-to-cs-losing-image-among-students.html)  
370 [students.html](http://blog.revolutionanalytics.com/2014/08/statistics-losing-ground-to-cs-losing-image-among-students.html)
- 371 Marblestone, A. H., Wayne, G., & Kording, K. P. (2016). Toward an integration of deep learning  
372 and neuroscience. *Frontiers in computational neuroscience*, 10.
- 373 Mazzone, P., Andersen, R. A., & Jordan, M. I. (1991). A more biologically plausible learning rule  
374 for neural networks. *Proceedings of the National Academy of Sciences*, 88(10), 4433-4437.
- 375 Minsky, M., & Papert, S. (1988). *Perceptrons: An Introduction to Computational Geometry*.  
376 Cambridge, MA: MIT press.
- 377 Olshausen, B. A., & Field, D. J. (1996). Emergence of simple-cell receptive field properties by  
378 learning a sparse code for natural images. *Nature*, 381(6583), 607.
- 379 Palmer, G. (1777). *Theory of Colour and Vision*, London: Leacroft.
- 380 Pearson, K., Yule, G. U., Blanchard, N., & Lee, A. (1903). The law of ancestral heredity.  
381 *Biometrika*, 2(2), 211-236.
- 382 Pelli, D. G., Burns, C. W., Farell, B., & Moore-Page, D. C. (2006). Feature detection and letter  
383 identification. *Vision research*, 46(28), 4646-4674.
- 384 Peterson, W. W. T. G., Birdsall, T., & Fox, W. (1954). The theory of signal detectability.  
385 *Transactions of the IRE professional group on information theory*, 4(4), 171-212.
- 386 Ranzato, M. A., Huang, F. J., Boureau, Y. L., & LeCun, Y. (2007). Unsupervised learning of  
387 invariant feature hierarchies with applications to object recognition. In *2007 IEEE conference on*  
388 *computer vision and pattern recognition*, pp. 1-8.

- 389 Ranzato, M. A., Poultney, C., Chopra, S., & LeCun, Y. (2007). Efficient learning of sparse  
390 representations with an energy-based model. In *Proceedings of NIPS*.
- 391 Riesenhuber, M., & Poggio, T. (1999). Hierarchical models of object recognition in  
392 cortex. *Nature neuroscience*, 2(11), 1019-1025.
- 393 Rojas, R. (1996). A short proof of the posterior probability property of classifier neural networks.  
394 *Neural Computation*, 8(1), 41-43.
- 395 Rosenblatt, F. (1958), The Perceptron: A Probabilistic Model for Information Storage and  
396 Organization in the Brain, *Psychological Review*, 65, 6, pp. 386–408.
- 397 Rubinov, M. (2015). Neural networks in the future of neuroscience research. *Nature Reviews*  
398 *Neuroscience*.
- 399 Rumelhart, D. E., Hinton, G. E., & Williams, R. J. (1986). Learning representations by back-  
400 propagating errors. *Nature*, 323, 533-536. doi:10.1038/323533a0.
- 401 Samuel, A. L. (1959). Some studies in machine learning using the game of checkers. *IBM*  
402 *Journal of research and development*, 3(3), 210-229.
- 403 Samuel, A. L. (1967). Some studies in machine learning using the game of checkers. II—recent  
404 progress. *IBM Journal of research and development*, 11(6), 601-617.
- 405 Schmidhuber, J. (2015). Deep learning in neural networks: An overview. *Neural networks*, 61,  
406 85-117.
- 407 Sejnowski, T. J., & Rosenberg, C. R. (1987). Parallel networks that learn to pronounce English  
408 text. *Complex systems*, 1(1), 145-168.
- 409 Seung, H. S., & Sompolinsky, H. (1993). Simple models for reading neuronal population codes.  
410 *Proceedings of the National Academy of Sciences*, 90(22), 10749-10753.
- 411 Szegedy, C., Zaremba, W., Sutskever, I., Bruna, J., Erhan, D., Goodfellow, I., & Fergus, R.  
412 (2013). Intriguing properties of neural networks. *arXiv preprint arXiv:1312.6199*.
- 413 Tanner Jr, W. P., & Birdsall, T. G. (1958). Definitions of  $d'$  and  $\eta$  as psychophysical measures.  
414 *The Journal of the Acoustical society of America*, 30(10), 922-928.
- 415 Turing, A.M. (1953). 'Digital computers applied to games'. in 'Faster than thought', ed. B.V.  
416 Bowden, London 1953. Published by Pitman Publishing.
- 417 Vapnik, V. (2013). *The nature of statistical learning theory*. Springer Science & Business Media.

418

419 Weber, E. H. (1834/1996). *EH Weber on the tactile senses*. Psychology Press. Translated by  
420 Helen E. Ross from E.H Weber (1834) *De Tactu*.

421 Werbos, P. (1974). *Beyond regression: New tools for prediction and analysis in the behavioral*  
422 *sciences*. PhD thesis, Harvard University.

423 Young, T. (1802). The Bakerian Lecture. On the theory of light and colours, *Philosophical*  
424 *Transactions of the Royal Society of London* 92, 12-48. doi: 10.1098/rstl.1802.0004

425 Yule, G. U. (1897). On the theory of correlation. *Journal of the Royal Statistical Society*, 60(4),  
426 812-854.

427 Zeiler, M. D., & Fergus, R. (2013). Visualizing and understanding convolutional networks. arXiv  
428 preprint arXiv:1311.2901.

429 Ziskind, A.J., Hénaff, O., LeCun, Y., & Pelli, D.G. (2014) The bottleneck in human letter  
430 recognition: A computational model. Vision Sciences Society, St. Pete Beach, Florida, May 16-  
431 21, 2014, 56.583. <http://f1000.com/posters/browse/summary/1095738>

432

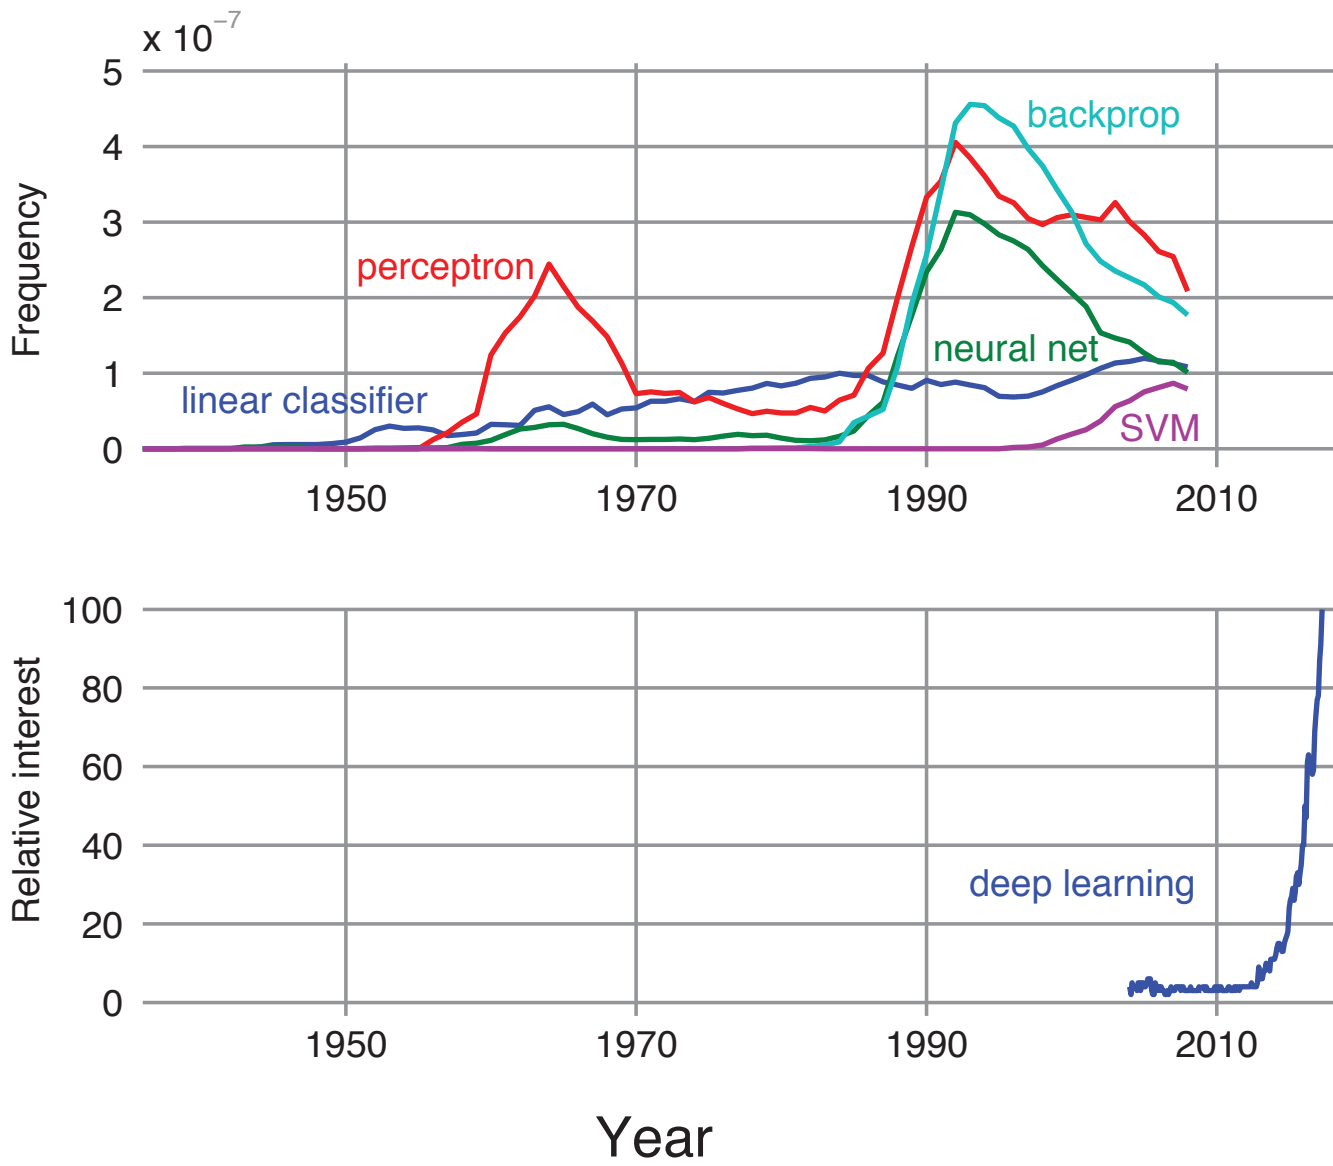

Source: http://www.biorxiv.org/content/10.1101/178152v1.full.pdf
